# Supplementary figures and images for: Prognostic relevance of FLT3-TKD mutations in AML: the combination matters—an analysis of 3082 patients
Source: Oxford University Press journal article supplement (doi:10.1182/blood-2007-05-091215), 2007-10-26

a)

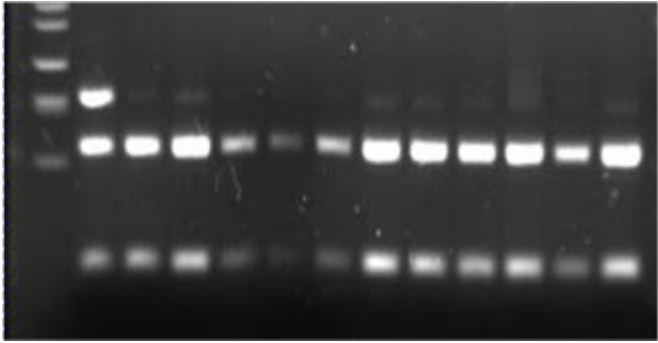

- 237 bp, mutated allele, undigested

- 169 bp, WT-allele, digested

- 68 bp, WT-allele, digested

b)

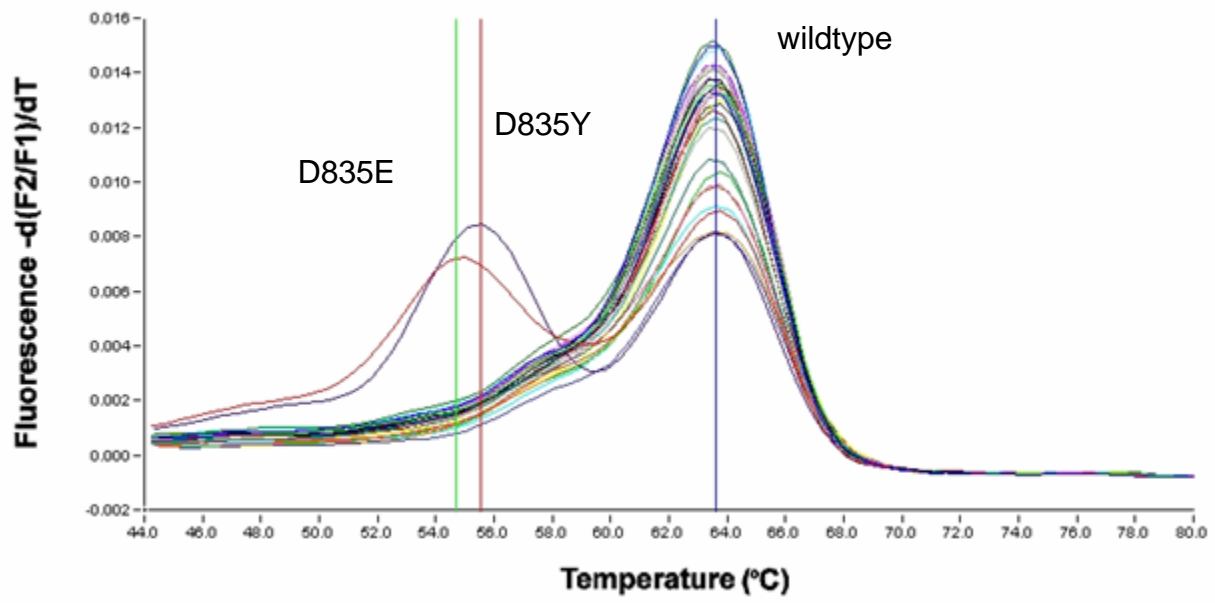

Supplement: zh2527-sup-figures1.pdf [file zh2527-sup-figures1.pdf]
